1           **OCR-Stats: Robust estimation and statistical testing of mitochondrial**  
2           **respiration activities using Seahorse XF Analyzer**

3           Vicente A. Yépez<sup>a,b</sup>, Laura S. Kremer<sup>c,d</sup>, Arcangela Iuso<sup>c,d</sup>, Mirjana Gušić<sup>c,d</sup>, Robert  
4           Kopajtich<sup>c,d</sup>, Eliška Koňářiková<sup>c,d</sup>, Agnieszka Nadel<sup>c,d</sup>, Leonhard Wachutka<sup>a</sup>, Holger  
5           Prokisch<sup>c,d</sup> and Julien Gagneur<sup>a,b,\*</sup>  
6

7           a. Department of Informatics, Technical University Munich, Boltzmannstr. 3, 85748 Garching,  
8           Germany.

9           b. Quantitative Biosciences Munich, Gene Center, Department of Biochemistry, Ludwig-  
10          Maximilians Universität München.

11          c. Institute of Human Genetics, Helmholtz Zentrum München, Ingolstädter Landstr. 1, 85764  
12          Neuherberg, Germany.

13          d. Institute of Human Genetics, Klinikum rechts der Isar, Technical University Munich,  
14          Ismaninger Str. 22, 81675 München, Germany.

15  
16          \*Correspondence to: J.G. ([gagneur@in.tum.de](mailto:gagneur@in.tum.de))

17          **Abstract**

18          Accurate quantification of cellular and mitochondrial bioenergetic activity is of great  
19          interest in medicine and biology. Mitochondrial stress tests performed with Seahorse  
20          Bioscience XF Analyzers allow estimating different bioenergetic measures by  
21          monitoring oxygen consumption rates (OCR) of living cells in multi-well plates.  
22          However, studies of statistical best practices for determining OCR measurements  
23          and comparisons have been lacking so far. Therefore, we performed mitochondrial  
24          stress tests in 126 96-well plates involving 203 fibroblast cell lines to understand how  
25          OCR behaves across different biosamples, wells, and plates. We show that the noise  
26          of OCR is multiplicative, that outlier data points can concern individual  
27          measurements or all measurements of a well, and that the inter-plate variation is  
28          greater than intra-plate variation. Based on these insights, we developed a novel  
29          statistical method, OCR-Stats, that: i) robustly estimates OCR levels modeling  
30          multiplicative noise and automatically identifying outlier data points and outlier wells;  
31          and ii) performs statistical testing between samples, taking into account the different  
32          magnitudes of the between- and within-plates variations. This led to a significant  
33          reduction of the coefficient of variation across plates of basal respiration by 36% and  
34          of maximal respiration by 32%. Moreover, using positive and negative controls, we  
35          show that our statistical test outperforms existing methods, which either suffer from

36 an excess of false positives (within-plates methods), or of false negatives (between-  
37 plates methods). Altogether, the aim of this study is to propose statistical good  
38 practices to support experimentalists in designing, analyzing, testing and reporting  
39 results of mitochondrial stress tests using this high throughput platform.

40 **Keywords:** Oxygen Consumption Rate (OCR); mitochondrial respiration;  
41 bioenergetics; statistical testing; outlier detection.

## 42 **1. Introduction**

43 Mitochondria are double membrane enclosed, ubiquitous, maternally inherited  
44 organelles present in most eukaryotic cells (1). They are mostly known as the  
45 powerhouses of the cell (2,3) due to their pivotal function in the cellular energy supply  
46 where ATP is generated by the mitochondrial respiratory chain in a process referred  
47 to as oxidative phosphorylation. Furthermore, mitochondria are involved in regulating  
48 reactive oxygen species (4), apoptosis (2), amino acid synthesis (5,6), cell  
49 proliferation (6), cell signaling (7), and in the regulation of innate and adaptive  
50 immunity (8). A decline in mitochondrial function, reflected by a diminished electron  
51 transport chain activity, is related to many human diseases ranging from rare genetic  
52 disorders (9) to common ones such as cancer (7,10), diabetes (11),  
53 neurodegeneration (12), and aging (3). One of the most informative tests of  
54 mitochondrial function is the quantification of cellular respiration, as it directly reflects  
55 electron transport chain impairment (9) and depends on many sequential reactions  
56 from glycolysis to oxidative phosphorylation (13). One of the last steps of cellular  
57 respiration is the oxidation of cytochrome c in complex IV which reduces oxygen to  
58 form water. Therefore, estimations of oxygen consumption rates (OCR) expressed in  
59 pmol/min, are conclusive for the ability to synthesize ATP and mitochondrial function,  
60 even more than measurements of intermediates (such as ATP or NADH) and  
61 potentials (16,17).

62 OCR was classically measured using a Clark-type electrode, which is time  
63 consuming, limited to whole cells in suspension and high yield, and does not allow  
64 automated injection of compounds (17). Also, experimentation with isolated  
65 mitochondria is ineffective because cellular regulation of mitochondrial function is  
66 removed during isolation (18). In the last few years, a new technology that calculates  
67 O<sub>2</sub> concentrations from fluorescence (19) in a microplate assay format has been  
68 developed by the company Seahorse Bioscience (now part of Agilent Technologies)  
69 (20). It allows simultaneous real-time measurements of both OCR and ECAR in  
70 multiple cell lines and conditions, reducing the amount of required sample material  
71 and increasing the throughput (14,20).

72 Typically, OCR and ECAR are measured using the Seahorse XF Analyzer in 96 (or  
73 24) well-plates at multiple time steps under three consecutive treatments (Fig. 1), in a  
74 procedure known as mitochondrial stress test (21). Under basal conditions,  
75 complexes I-IV exploit energy derived from electron transport to pump protons across  
76 the inner mitochondrial membrane. The thereby generated proton gradient is  
77 subsequently harnessed by complex V to generate ATP. Blockage of the proton  
78 translocation through complex V by oligomycin represses ATP production and  
79 prevents the electron transport throughout complexes I-IV due to the unexploited  
80 gradient, thus generating ATP-ase independent OCR only (Figs. 1A-B).  
81 Administration of FCCP, an ionophor, subsequently dissipates the gradient  
82 uncoupling electron transport from complex V activity and increasing oxygen  
83 consumption to a maximum level (Figs. 1A-B). Finally, mitochondrial respiration is  
84 completely halted using rotenone, a complex I inhibitor. There is still some remaining  
85 oxygen consumption that is independent from electron transport chain activity (Figs.  
86 1A-B). This approach is label-free and non-destructive, so the cells can be retained  
87 and used for further assays (15).

88 **Figure 1. Principle of the mitochondrial stress test assay (A)** Cartoon illustration  
89 of OCR levels (y-axis) versus time (x-axis). Injection of the three compounds

90 oligomycin, FCCP and rotenone delimit four time intervals within which OCR is  
91 roughly constant. **(B)** Targets of each compound in the electron transport chain. **(C)**  
92 Typical layout of a mitochondrial stress test 96-well plate.

93 OCR differences in the natural scale between the various stages of this procedure  
94 lead to the estimation of six different bioenergetics measures: basal respiration,  
95 proton leak, non-mitochondrial respiration, ATP-linked respiration, spare respiratory  
96 capacity, and maximal respiration (14,17) (Table 1). An increase in proton leak and a  
97 decrease in maximal respiration are indicators of mitochondrial dysfunction (17).  
98 ATP-linked respiration, basal respiration, and spare capacity alter also in response to  
99 ATP demand, which is not necessarily mitochondrion-related as it may be the  
100 consequence of deregulation of any cellular process altering general cellular energy  
101 demand.

102 Current literature describing the Seahorse technology addresses experimental  
103 aspects regarding sample preparation (22,23), the amount of cells to seed (23,24),  
104 and compound concentration in different organisms (13,22,25). However, studies  
105 regarding statistical best practices for determining OCR levels and testing them  
106 against another are lacking. The sole definition of bioenergetic measures varies  
107 between authors, as well as the number of time points in each interval (usually three  
108 time points, but in some cases: one (26), two (27), and four or more (11)); and  
109 whether differences (6,13,28), ratios (12,29), or both (24,25) should be computed.  
110 Consequently, comparison of results across studies is difficult. Moreover, statistical  
111 power analyses for experimental design are often not provided. Differences in OCR  
112 between biosamples (e.g. patient vs. control, or gene knockout vs. WT) can be as  
113 low as 12 – 30% (30–32). Therefore, to design experiments with appropriate power  
114 to significantly detect such differences, it is important to know the source and  
115 amplitude of the variation within each sample, and reduce it as much as possible.

116 We performed and analyzed a large dataset of 126 experiments in 96-well plate  
117 format involving 203 different fibroblast cell lines, out of which 26 were seeded in  
118 more than one plate (Table S1). The large amount of between-plate and within-plate  
119 replicates allowed us to statistically characterize the nature and magnitude of biases  
120 and random variations in these data. We developed a statistical procedure called  
121 OCR-Stats, to extract robust and accurate oxygen consumption rates for each well,  
122 which translates into robust summarized values of the multiple replicates within and  
123 between plates. The OCR-Stats algorithm includes automatic outlier identification  
124 and controls for well and plates biases, which led to a significant increase in accuracy  
125 over state-of-the-art methods.

126 Between-well and between-plate biases, as well as random variations, were found to  
127 be multiplicative. This motivated us for a definition of bioenergetics measures based  
128 on ratios: ETC-dependent OC proportion, ATPase-dependent OC proportion, ETC-  
129 dependent proportion of ATPase-independent OC, and Maximal OC fold change  
130 (Table 1).

**Table 1.** OCR ratios, abbreviations and equivalents

| OCR ratios                                        | Abbreviation       | Equivalent                                  |
|---------------------------------------------------|--------------------|---------------------------------------------|
| ETC-dependent OC proportion                       | E/I – proportion   | Basal Respiration: $OCR_1 - OCR_4$          |
| ATPase-dependent OC proportion                    | A/I – proportion   | ATP-linked respiration: $OCR_1 - OCR_2$     |
| ETC-dependent proportion of ATPase-independent OC | E/Ai - proportion  | Proton Leak: $OCR_2 - OCR_4$                |
| Maximal OC fold change                            | M/I – fold change  | Spare respiratory capacity: $OCR_3 - OCR_1$ |
| Maximal over ETC-independent OC fold change       | M/Ei – fold change | Maximal respiration: $OCR_1 - OCR_4$        |

|                        |             |                                           |
|------------------------|-------------|-------------------------------------------|
| Not defined as a ratio | Not defined | Non-mitochondrial respiration:<br>$OCR_4$ |
|------------------------|-------------|-------------------------------------------|

131

132 We provide estimators for each instance and show that they are empirically normally  
133 distributed. This permitted the use of linear regression models for assessing the  
134 statistical significance of bioenergetics measures comparisons between two  
135 biosamples. Using positive and negative controls from individuals known to have  
136 mitochondrial respiratory defects, we show that OCR-stats outperforms currently  
137 used statistical tests, which either suffer from an excess of false positives (within-  
138 plates methods), or of false negatives (between-plates methods).

139 Furthermore, our study provides experimental design guidance by i) showing that  
140 between-plate variation largely dominates within-plate variation, implying that it is  
141 important to seed the same biosamples in multiple plates, and ii) providing estimates  
142 of variances within and between plates for each bioenergetic measure allowing for  
143 statistical power computations. A free and open source implementation of OCR-stats  
144 in the statistical language R is provided at [github.com/gagneurlab/OCR-Stats](https://github.com/gagneurlab/OCR-Stats).

## 145 **2. Results**

### 146 **2.1 Experimental design and raw data**

147 We measured OCR, ECAR, and cell number of 203 dermal fibroblast cultures  
148 derived from patients suffering from rare mitochondrial diseases and control cells  
149 from healthy donors (normal human dermal fibroblasts - NHDF, Methods, Table S1).  
150 These were assayed in 126 plates, all using the same protocol (Methods). Also, 26  
151 cell lines were grown independently and measured in multiple plates. We will refer to  
152 these growth replicates as different biosamples. The NHDF cell line was seeded in all  
153 plates for assessment of potential systematic plate biases. The corners of each plate  
154 were left as blank, i.e. filled with media but not cells, to control for changes in  
155 temperature (22). One common layout of a plate is depicted in Fig. 1C, showing how

156 each biosample is present in many well replicates. We seeded between 3 and 7  
157 biosamples per plate (median = 4). This variation reflects typical set-ups of  
158 experiments in a lab performed over multiple years. Then, we used the standard  
159 mitochondrial stress test assay (21) leading to four time intervals with three time  
160 points each and denoted by  $\text{Int}_1$  (before adding any treatment),  $\text{Int}_2$  (after oligomycin),  
161  $\text{Int}_3$  (after FCCP) and  $\text{Int}_4$  (after rotenone) (Fig. 1A). We also flagged wells that did  
162 not react as expected to the treatments and discarded them from the statistical  
163 analysis (Methods).

## 164 **2.2 Random and systematic variations between replicates within plates**

165 Representative replicate time series are shown in Fig. 2A, with data from 12 wells for  
166 one biosample in a single plate depicting commonly observed variations.

167 **Figure 2. OCR behavior over time.** (A) Typical time series replicates inside a plate.  
168 Behavior of OCR expressed in pmol/min (y-axis) of Fibro\_VY\_017 over time (x-axis).  
169 Colors indicate the row, and shape the column of 12 well replicates. Variation  
170 increases for larger OCR values, OCR has a systematic well effect and there exist  
171 two types of outliers: well-level and single-point. (B) Scatterplot of standard deviation  
172 (y-axis) vs. mean (x-axis) of all 3 time replicates of each interval, well and plate of  
173 OCR of NHDF only, shows a positive correlation ( $n = 409$ ). (C) Same as (B) but for  
174 the logarithm of OCR, where the correlation disappears.

175 First, outlier data points occurred frequently. We distinguished two different types of  
176 outliers: entire series for a well (e.g., well G5 in Fig. 2A) and individual data points  
177 (e.g., well B6 at time point 6 in Fig. 2A). In the latter case, eliminating the entire  
178 series for well B6 would be too restrictive and result in losing valuable data from the  
179 other 11 valid time points. Therefore, methods to detecting outliers considering these  
180 two possibilities must be devised.

181 Second, we noticed a proportional dependence of OCR value and variance between  
182 replicates (Fig. 2B), suggesting that the error is multiplicative. Unequal variance, or

183 heteroscedasticity, can strongly affect the validity of statistical tests and the  
184 robustness of estimations. We therefore propose modeling OCR on a logarithmic  
185 scale, where the dependency between variance and mean disappears (Figs. 2B, 2C).  
186 Respiratory chain enzyme activities such as NADH-ubiquinone reductase have also  
187 been shown to obey log-normal distributions (33).  
188 Third, we observed systematic biases in OCR between wells (e.g., OCR values of  
189 well C6 are among the highest, while OCR values of well B5 are among the lowest at  
190 all time points, Fig. 2A). Variations in: cell number, initial conditions, treatment  
191 concentrations, or fluorophore sleeve calibration can lead to systematic differences  
192 between wells, which we refer to as well biases. To investigate whether well biases  
193 could be corrected using cell number to a large extent as in (26), we counted the  
194 number of cells after the experiments using Cyquant (Methods). As expected,  
195 median OCR for each interval grows linearly with cell number measured at the end of  
196 the experiment (Spearman rho between 0.32 and 0.47,  $P < 2.2e-16$ , Fig. S1A).  
197 However, the relation is not perfect reflecting important additional sources of  
198 variations and also possible noise in measuring cell number. Strikingly, dividing OCR  
199 by cell count led to a higher coefficient of variation (standard deviation divided by the  
200 mean) between replicate wells than without that correction (Fig. S1B). This analysis  
201 showed that normalization for cell number by division by raw cell counts is insufficient  
202 and motivated us to derive another method to capture well biases. Finally, we found  
203 that sex does not significantly associate with OCR levels (Fig. S2), in agreement with  
204 (34).

### 205 **2.3 A statistical model of OCR**

206 Building on these insights, we next introduced a statistical model for OCR within  
207 plates. For a given biosample in one plate, we modeled the logarithm of OCR  $y_{w,t}$  of  
208 well  $w$  at time point  $t$  as a sum of well biases, interval effects and noise, i.e.,:

$$y_{w,t} = \alpha_{i(t)} + \beta_w + \varepsilon_{w,t}, \quad (1)$$



209 where  $\alpha_{i(t)}$  is the effect of the interval  $i(t)$  of time point  $t$ ,  $\beta_w$  is the relative bias of well  
 210  $w$  compared to a reference well, and  $\varepsilon_{w,t}$  is the error.

211 We defined the OCR levels  $\theta_i$  as the expected log OCR per interval, averaged over  
 212 all wells:

$$\hat{\theta}_i = \alpha_i(t) + \frac{\sum_w \beta_w}{n}, \quad (2)$$

213 where  $n$  is the number of wells.

214 Note that the well bias is modeled independently for each plate, i.e., the bias of a  
 215 certain well in one plate is different from the bias of the well at the same location in  
 216 another plate.

217 We present now the OCR-Stats algorithm. For a given plate:

- 218 1. Fit the log linear model (1) using the least-squares method, which consists in  
 219 minimizing  $\sum_w \sum_t (y_{w,t} - \alpha_{i(t)} - \beta_w)^2$ , thus obtaining the coefficients  $\alpha_i$ ,  $\beta_w$ .  
 220 Compute  $\hat{\theta}_i$  using (2).
- 221 2. For each time point  $t$  in interval  $i$  and well  $w$ , define the OCR residual:  
 222  $e_{w,t} = y_{w,t} - \hat{\theta}_{i(t)}$ , which is used to identify outliers (Methods, Fig. S3).
- 223 3. Identify and remove well level outliers, fit again, iteratively, until no more are  
 224 found (Fig. S3A-B).
- 225 4. Identify and remove single point outliers, fit again, iteratively, until no more  
 226 are found (Fig. S3C-D).
- 227 5. Scale back to natural scale in order to compute the bioenergetics measures  
 228 (e.g.: Basal respiration =  $\exp(\theta_1) - \exp(\theta_4)$ ), or take the ratio-based metrics  
 229 (Tables 1 and 2).

**Table 2.** OCR ratio-based metrics

| OCR ratios                  | Metrics                                                          |
|-----------------------------|------------------------------------------------------------------|
| ETC-dependent OC proportion | $\frac{OCR_1 - OCR_4}{OCR_1} = 1 - \exp(\theta_{Ei} - \theta_I)$ |

|                                                   |                                                                     |
|---------------------------------------------------|---------------------------------------------------------------------|
| ATPase-dependent OC proportion                    | $\frac{OCR_1 - OCR_2}{OCR_1} = 1 - \exp(\theta_{Ai} - \theta_I)$    |
| ETC-dependent proportion of ATPase-independent OC | $\frac{OCR_2 - OCR_4}{OCR_2} = 1 - \exp(\theta_{Ei} - \theta_{Ai})$ |
| Maximal OC fold change                            | $\frac{OCR_3}{OCR_1} = \exp(\theta_M - \theta_I)$                   |
| Maximal over ETC-independent OC fold change       | $\frac{OCR_3}{OCR_4} = \exp(\theta_M - \theta_{Ei})$                |

230

## 231 **2.4 Variations within plates**

232 We were then interested in determining the amplitude of the OCR variation between  
 233 wells inside each plate, in order to compute the number of wells needed to obtain  
 234 robust estimates  $\hat{\theta}$ . Using only the controls NHDF, we computed the standard  
 235 deviation  $\sigma_{i,j}^w$  of the logarithm of OCR across all wells for each plate  $j$  and interval  $i$ .  
 236 Then, we computed the median across plates, thus obtaining one value  $\sigma_i^w$  per  
 237 interval ( $\sigma_1^w = 0.10$ ,  $\sigma_2^w = 0.13$ ,  $\sigma_3^w = 0.12$ ,  $\sigma_4^w = 0.16$ ). As we work in the logarithmic  
 238 scale, the error in the natural scale becomes multiplicative and relative. The standard  
 239 error of the estimates  $\hat{\theta}$  can be expressed as  $\sigma_{\hat{\theta}_i} = \sigma_i^w / \sqrt{n_w}$ , where  $n_w$  is the number  
 240 of wells. The highest value of  $\sigma_i^w$  was 0.16, therefore cells should be seeded in 10  
 241 wells in order to get a relative error of 5%. This result is derived from variation after  
 242 removing outliers, so considering that around 16.5% of wells were found to be  
 243 outliers, ideally  $10 / (1 - 0.165) \approx 12$  wells should be used per biosample to get a  
 244 relative error of 5%.

## 245 **2.5 Variations between plates**

246 After analyzing the OCR variation among wells inside plates, we set up to study the  
 247 variation across multiple plates. Using data from the controls NHDF, we found that  
 248 the variability between plates in all four intervals is much larger than between wells  
 249 (Table S2, Fig. S4). We next asked whether a systematic plate bias exists that could

250 be corrected for. We indeed observed a similar increase in OCR on interval 1 for both  
251 biosamples on plate #20140430 with respect to plate #20140428 (Fig. 3A). To test  
252 whether this tendency held across the repeated biosamples, we compared all  
253 replicate pairings with their respective NHDF controls and found a positive correlation  
254 (Fig. 3B). These differences can come from changes in temperature or the use of  
255 different sensor cartridges (13). Because the plate biases are systematic, they can  
256 be corrected for by using a log linear model (Methods). Nonetheless, the biases do  
257 not explain all the between plate variation, as the remaining variance is large (relative  
258 variance of the residuals:  $I_1$ : 49.8%,  $I_2$ : 51.6%,  $I_3$ : 65.6% and  $I_4$ : 55.9%). Therefore,  
259 when comparing two samples, it is important that they are seeded in the same plate,  
260 and that the test is performed multiple times.

261 **Figure 3. Plate bias. (A)** Log of OCR in interval 3 (y-axis) for the cell lines #65126  
262 and NHDF (x-axis) which were seeded in 2 different plates (color-coded). The similar  
263 increase in OCR from plate #20140128 to #20140430 in both biosamples suggests  
264 that there is a systematic plate bias. **(B)** Scatterplots of the differences of the  
265 logarithm of OCR levels  $\theta$  of all possible 2 by 2 combinations of repeated biosamples  
266 across experiments (y-axis) against their respective controls (NHDF) (x-axis) show  
267 that there exists a positive correlation ( $I_1$ :  $\rho = 0.64$ ,  $P < 2.3 \times 10^{-8}$ ,  $I_2$ :  $\rho = 0.65$ ,  $P <$   
268  $1.2 \times 10^{-8}$ ,  $I_3$ :  $\rho = 0.52$ ,  $P < 1.2 \times 10^{-5}$ ,  $I_4$ :  $\rho = 0.64$ ,  $P < 1.4 \times 10^{-8}$ ), confirming a systematic  
269 plate bias ( $n = 63$ ). **(C)** Scatterplot of the difference of log OCR levels of patients vs.  
270 control NHDF (both axes) of every interval with respect to another. All intervals  
271 correlate with each other even after removing plate bias (by subtracting control  
272 values).

## 273 **2.6 Statistical testing for the comparison of biosamples**

274 In order to compare bioenergetics measures of two biosamples, we first need to  
275 evaluate the suitability of testing using differences versus testing using ratios of the  
276 OCR levels in the natural scale. As there is a remaining cell number effect after

277 correcting for well biases (Fig. 3C), we recommend testing using ratios of OCR levels  
 278 (or differences in the logarithmic scale) (Table 3).

**Table 3: OCR ratio based differences for statistical testing**

| OCR ratios $b$                                    | Tested differences $d$                                              |
|---------------------------------------------------|---------------------------------------------------------------------|
| ETC-dependent OC proportion                       | $(\theta_{I,f} - \theta_{Ei,f}) - (\theta_{I,c} - \theta_{Ei,c})$   |
| ATPase-dependent OC proportion                    | $(\theta_{I,f} - \theta_{Ai,f}) - (\theta_{I,c} - \theta_{Ai,c})$   |
| ETC-dependent proportion of ATPase-independent OC | $(\theta_{Ai,f} - \theta_{Ei,f}) - (\theta_{Ai,c} - \theta_{Ei,c})$ |
| Maximal OC fold change                            | $(\theta_{M,f} - \theta_{I,f}) - (\theta_{M,c} - \theta_{I,c})$     |
| Maximal over ETC-independent OC fold change       | $(\theta_{M,f} - \theta_{Ei,f}) - (\theta_{M,c} - \theta_{Ei,c})$   |

279 Subsequently, for any given OCR ratio  $b$  (eg. M/Ei - fold change), we test the  
 280 differences of the log OCR ratios of a cell line  $f$  versus a control  $c$  using the following  
 281 linear model:

$$d_{b,f,p} = \mu_{b,f} + \epsilon_{b,f,p}, (3)$$

282 where  $d_{b,f,p}$  corresponds to the difference of ratio  $b$  of a cell line  $f$  and the respective  
 283 control on plate  $p$ . We solve it using linear regression, thus obtaining one value  $\mu_{b,f}$   
 284 per each ratio  $b$  and cell line  $f$ . We then compare these  $\mu_{b,f}$  values (which follow a t-  
 285 Student distribution) against the null hypothesis  $\mu_{b,f} = 0$  to compute p-values and  
 286 confidence intervals (Figs. 4A, 4B, Methods).

### 287 **2.7 Benchmark of OCR-Stats algorithm**

288 In order to benchmark the OCR-Stats algorithm, we computed the coefficient of  
 289 variation (standard deviation divided by mean) of the six bioenergetics measures in  
 290 the natural scale of all repeated biosamples across plates for the following methods:

- 291 i) the default Extreme Differences (ED) method (Methods) provided by the vendor, ii)  
 292 the log linear (LL) corresponding to steps 1 and 2 of the OCR-Stats algorithm, iii)  
 293 complete OCR-Stats (LL + outlier removal), and iv) OCR-Stats after correcting for

294 plate effect (OCR-PE) using (4) (Methods).

295 Each step contributed to decreasing the coefficient of variation, obtaining a final  
296 significant reduction of 36% and 32% in basal and maximal respiration, respectively,  
297 from plate corrected OCR-Stats (OCR-PE) with respect to ED ( $P < 0.03$ , one-sided  
298 Wilcoxon test) (Fig. 5).

299 **Figure 5. Benchmark using coefficient of variation.** Coefficient of variation (CV =  
300 standard deviation / mean, y-axis) of replicates across experiments ( $n=26$ ) using  
301 different methods (x-axis) to estimate the 6 bioenergetics measures. In all, except for  
302 Spare Capacity, OCR-Stats with plate effect showed significantly lower variation with  
303 respect to the Extreme Differences method. P-values obtained from one-sided paired  
304 Wilcoxon test.

### 305 **2.8 Benchmark of OCR-Stats statistical testing method**

306 We applied OCR-Stats statistical testing, Extreme Differences plus Wilcoxon test  
307 within each plate (within-plate ED), and Extreme Differences plus Wilcoxon test  
308 across plates (across-plate ED) to obtain the M/Ei ratio and maximal respiration (MR)  
309 of all the 26 cell lines that were seeded in more than one plate (Methods). For every  
310 approach, we computed p-values for significant fold changes against the controls. Six  
311 of these cell lines come from patients with rare variants in genes associated with an  
312 established cellular respiratory defect, allowing for assessing the sensitivity of each  
313 approach (Table S3, (35–39)). Additionally, two cell lines (#73901 and #91410) that  
314 showed no significant respiratory defects in earlier studies (40,41) served as negative  
315 controls.

316 The within-plate ED method reported significantly higher or lower MR for 56 out of 69  
317 (81.2%) biosamples with respect to the control (Fig. 4A, Table S3). Moreover, all 26  
318 cell lines had one or more significant biosamples on every plate, and 11 cell lines had  
319 one or more not significant sample (Fig. 4A). These ambiguous results show the  
320 importance of testing using multiple plates and advocate for a more robust approach

321 than within-plate ED.

322 **Figure 4. Statistical testing of M/Ei fold change patient vs. control on multiple**  
323 **plates. (A)** Ratio of M/Ei fold change (y-axis) of all cell lines repeated across plates  
324 (x-axis) and their respective control, sorted by p-value obtained using the OCR-Stats  
325 method. Left of the red dashed line are cell lines with significantly lower M/Ei fold  
326 change using OCR-Stats. Dots in orange represent cell lines with significantly lower  
327 or higher M/Ei fold change using the ED method. Highlighted positive (+) and  
328 negative (-) controls. **(B)** Similar as (A), but depicting the p-value in logarithmic scale  
329 (y-axis) using OCR-Stats. Red dashed line at  $P = 0.05$ . Dots in red represent  
330 biosamples with significantly lower M/Ei fold change using the OCR-Stats method.  
331 **(C)** Quantile-quantile theoretical (x-axis) vs. observed (y-axis) plot of the residuals of  
332 the linear model (3) applied to M/Ei fold change.

333 One approach to evaluate samples seeded in multiple plates is to perform a  
334 Wilcoxon test on the ED values averaged per plate (across-plate ED, Methods).  
335 However, this requires at least five plate replicates in order to obtain significant  
336 results. Here, only one cell line, #78661, was found significant this way. On this data,  
337 OCR-Stats was much more conservative than within-plate ED and found only 7 out of  
338 26 (26.9%) cell lines to have aggregated significantly lower M/Ei than the control,  
339 including all 6 positive control cell lines (Figs. 4A, 4B, Table S3). Moreover, OCR-  
340 Stats did not report significant M/Ei differences for the two negative controls. There  
341 was no evidence against the normality and homoscedasticity assumption of OCR-  
342 Stats as the quantile-quantile plots of the residuals aligned well along the diagonal  
343 (Figs. 4C, S5). Altogether, these results show that OCR-Stats successfully identifies  
344 and removes variation within and between plates, providing more stable testing  
345 results which translates into less false positives.

## 346 **Discussion and conclusion**

347 Mitochondrial studies using extracellular fluxes, specifically the XF Analyzer from

348 Seahorse, are gaining popularity; therefore, it is of paramount importance to have a  
349 proper statistical method to estimate the OCR levels from the raw data. Here, we  
350 have developed such a model, the OCR-Stats algorithm, which includes approaches  
351 to control for well and plate biases, and automatic outlier identification. By doing so,  
352 we were able to significantly reduce the coefficient of variation of replicates across  
353 plates. Additionally, after analyzing the intra-plate variation, we suggest that the  
354 minimum number of wells replicates per biosample in a 96 well-plate should be 12.  
355 We found that dividing cellular OCR by cell number was introducing more noise than  
356 was seen for uncorrected data. Here, we seeded always the same number of cells.  
357 Hence, the variations across wells that we observed in cell number at the end of the  
358 experiments are largely overestimated by noise in measurements. In other  
359 experimental settings in which different numbers of cells are seeded, we suggest to  
360 include an offset term to the model (1) equal to the logarithm of the seeded cell  
361 number to control for this variation by design. Also, the Seahorse XF Analyzer can be  
362 used on isolated mitochondria and on isolated enzymes, where a normalization  
363 approach is to divide OCR by mitochondrial proteins or enzyme concentration (42).  
364 However, as described here for cellular assays, robust normalization procedures  
365 require careful analysis.

366 We showed that there is roughly multiplicative bias between plates that can be  
367 controlled for to some extent by including control samples on every plate. To handle  
368 this plate bias, we proposed an extension of our within-plate robust linear regression  
369 approach adding a plate specific term. We demonstrated that OCR comparisons  
370 should be done using ratios rather than differences, as this eliminates sources of  
371 variation like cell number. We introduced a linear model, the OCR-Stats statistical  
372 testing, and showed that the results agree with previous results of patients diagnosed  
373 with mitochondrial disorders.

374 Significance with the OCR-Stats statistical algorithm can be reached by seeding a

375 biosample in one plate only; provided there were other between-plate replicates to  
376 compute the inter-plate variance. Nevertheless, we still recommend performing at  
377 least 3 independent experiments of the same cell lines as one result alone can lead  
378 to wrong conclusions (Fig. 4A). Also note that a contaminated sample can increase  
379 the variability, affecting the significance of other samples. Therefore, it is important to  
380 detect them and discard them from further analysis.

381 In principle, OCR-Stats should be able to estimate ECAR levels. Similar analyses as  
382 performed here should be done beforehand in order to guarantee that the method is  
383 indeed applicable. Preliminary investigations suggest that the nature of noise  
384 (outliers, multiplicative) is similar than for OCR.

## 385 **Methods**

### 386 **Biological material**

387 All biosamples come from primary fibroblast cell lines of humans suffering from rare  
388 mitochondrial diseases, established in the framework of the German and European  
389 networks for mitochondrial disorders mitoNet and GENOMIT. The controls are  
390 primary patient fibroblast cell lines, normal human dermal fibroblasts (NHDF) from  
391 neonatal tissue, commercially available from Lonza, Basel, Switzerland.

### 392 **Measure of extracellular fluxes using Seahorse XF96**

393 We seeded 20,000 fibroblasts cells in each well of a XF 96-well cell culture  
394 microplate in 80 ml of culture media, and incubated overnight at 37°C in 5% CO<sub>2</sub>.  
395 The four corners were left only with medium for background correction. Culture  
396 medium is replaced with 180 ml of bicarbonate-free DMEM and cells are incubated at  
397 37°C for 30 min before measurement. Oxygen consumption rates (OCR) were  
398 measured using a XF96 Extracellular Flux Analyzer (21). OCR was determined at  
399 four levels: with no additions, and after adding: oligomycin (1 μM); carbonyl cyanide  
400 4-(trifluoromethoxy) phenylhydrazone (FCCP, 0.4 μM); and rotenone (2 μM)  
401 (additives purchased from Sigma at highest quality). After each assay, manual



402 inspection was performed on all wells using a conventionally light microscope. Wells  
403 for which the median OCR level did not follow the expected order, namely,  
404  $\text{median}(\text{OCR}(\text{Int}_3)) > \text{median}(\text{OCR}(\text{Int}_1)) > \text{median}(\text{OCR}(\text{Int}_2)) > \text{median}(\text{OCR}(\text{Int}_4))$ ,  
405 were discarded (977 wells, 10.47%). It is important to notice that other cell lines, or  
406 cell lines under certain conditions may not react as expected to the standard  
407 treatments, so they should not be discarded. We also excluded from the analysis  
408 contaminated wells and wells in which the cells got detached (461 wells, 4.94%,  
409 Methods). All the raw OCR data is available in Table S4.

#### 410 **Cell number quantification**

411 Cell number was quantified using the CyQuant Cell Proliferation Kit (Thermo Fisher  
412 Scientific, Waltham, MA, USA) according to the manufacturer's protocol. In brief,  
413 cells were washed with 200  $\mu\text{L}$  PBS per well and frozen in the microplate at  $-80^\circ\text{C}$  to  
414 ensure subsequent cell lysis. Cells were thawed and resuspended vigorously in 200  
415  $\mu\text{L}$  1x cell-lysis buffer supplemented with 1x CyQUANT GR dye per well.  
416 Resuspended cells were incubated in the dark for 5 min at RT whereupon  
417 fluorescence was measured (excitation: 480 nm, emission: 520 nm).

#### 418 **Extreme Differences (default) Method to compute bioenergetics measures**

419 On every plate independently, for each well, on interval 1 take the OCR  
420 corresponding to the last measurement, on intervals 2 and 4 take the minimum and  
421 on interval 3 the maximum OCR value (14). Then, do the corresponding differences  
422 to estimate the bioenergetics measures. Report the results per patient as the mean  
423 across wells plus standard deviation or standard error, separately for each plate.

#### 424 **Outlier Removal**

425 For each sample  $s$  and well  $w$ , compute the mean across time points of its squared  
426 residuals:  $r_w := \text{mean}_t(e_{w,t}^2)$ , thus obtaining a distribution  $r$ . Identify as outliers the  
427 wells whose  $r_w > \text{median}(r) + 5 \cdot \text{mad}(r)$ , where  $\text{mad}$ , median absolute deviation, is  
428 a robust estimation of the standard deviation (Fig. S3A). We found that deviations by

429 5 mad from the median were selective enough in practice. Compute the vector of  
430 estimates  $\hat{\theta}$  using the remaining wells and iterate this procedure until no more wells  
431 are identified as outliers. It required 8 iterations until convergence and around 16.5%  
432 of all the wells were found to be outliers (Fig. S3B).

433 Single point outliers are identified in a similar way. After discarding the wells that  
434 were found to be outliers in the previous step, categorize as outliers single data  
435 points whose  $e_{w,t}^2 > \text{median}_t(e_{w,t}^2) + 5 \cdot \text{mad}_t(e_{w,t}^2)$  (Fig. S3C). Iterate until no more  
436 outliers are found. It required 19 iterations until convergence and approximately 6.1%  
437 of single points were found to be outliers (Fig. S3D).

#### 438 **Plate effect model**

439 In an attempt to correct for plate effect, we propose a log linear model where the  
440 levels  $\theta'$  depend on interval  $i$ , samples  $s$  and plate  $p$ :

$$\theta'_{i,s,p} = \alpha_{i,s} + \beta_{i,p} + \varepsilon_{i,s,p},$$

441 thus obtaining one coefficient  $\beta_{i,p}$  for each plate-interval combination. These effects  
442 are added to the previous estimates:  $\hat{\theta}_{i,s,p}^f = \hat{\theta}_{i,s} - \beta_{i,p}$ , obtaining the final estimates  
443  $\hat{\theta}^f$ . As for (1), the model is solved using linear regression.

444 For benchmarking, we cannot test using the estimates  $\hat{\theta}^f$ , because we would fall into  
445 circularity, as correcting using  $\beta_{i,p}$  forces replicates to have a closer value. Therefore,  
446 just for benchmarking purposes, we correct for plate effect using only the data from  
447 the controls NHDF  $c$  of each plate, namely:

$$y_{i,p}^c = \beta_0^c + \beta_i^c + \beta_p^c + \varepsilon_{i,p}.$$

448 We solved it using linear regression and used the effects  $\beta_p^c$  as offsets in (1). Then,  
449 we recomputed  $\hat{\theta}_i$  values accordingly. We scaled back to natural scale to calculate  
450 the bioenergetics measures and the coefficient of variation of all repeated  
451 biosamples (except the control).

#### 452 **Multi-plate averaging method**

453 In case of inter-plate comparisons, the multi-plate averaging methods takes the  
454 average and standard error of the bioenergetics measures obtained using the ED  
455 method of all repeated biosamples across plates (Agilent Technologies, 2016).

#### 456 **OCR-Stats statistical testing**

457 To evaluate the OCR ratios between a sample  $f$  and a control, both located on a  
458 plate  $p$ , we use the corresponding tested difference  $d$  (Table 3). We define  $\mu_{i,j,f,p} :=$

459  $[\hat{\theta}_i - \hat{\theta}_j]_{f,p} - [\hat{\theta}_i - \hat{\theta}_j]_{NHDF,p}$ , where  $i$  and  $j$  are any two different intervals. From there,

460 we can obtain a t-statistic:  $t_{\hat{d}} = \frac{\mu - d_0}{se(\mu)}$ , where  $d_0 = 0$  as that is the value that we want to

461 compare  $\mu$  against, and  $se$  is the standard error. The t-statistic follows a t-distribution

462 with  $n - 2$  degrees of freedom, from which we can compute p-values. Moreover, we

463 can obtain confidence intervals:  $[\mu - se(\mu)t_{n-2}^\alpha, \mu + se(\mu)t_{n-2}^\alpha]$ , where  $(1 - \alpha)$  is the

464 confidence level and  $t_{n-2}^\alpha$  the  $(1 - \alpha/2)$  quantile of the  $t_{n-2}$  distribution. Note that the

465 normality assumption holds for the residuals  $\epsilon_{b,f,p}$  (Figs. 4C, S5).

#### 466 **Acknowledgements**

467 We would like to thank Daniel Bader, Žiga Avsec, Jun Cheng and all members from

468 the Gagneur Lab for valuable discussions and manuscript revision. This study was

469 supported by the German Bundesministerium für Bildung und Forschung (BMBF)

470 through the German Network for mitochondrial disorders (mitoNET, 01GM1113C to

471 H.P.) E-Rare project GENOMIT (01GM1207 to H.P.), the Juniorverbund in der

472 Systemmedizin 'mitOmics' (FKZ 01ZX1405A J.G., L.W. and V.A.Y.) and the DZHK

473 (German Centre for Cardiovascular Research, L.S.K.). A Fellowship through the

474 Graduate School of Quantitative Biosciences Munich (QBM) supports V.A.Y. H.P. is

475 supported by EU FP7 Mitochondrial European Educational Training Project (317433).

476 J.G., V.A.Y., L.S.K. and R.K. and H.P. are supported by EU Horizon2020

477 Collaborative Research Project SOUND (633974). We thank the Cell lines and DNA

478 Bank of Pediatric Movement Disorders and Mitochondrial Diseases of the Telethon  
479 Genetic Biobank Network (GTB09003).

## 480 **Author contributions**

481 J.G. and H.P. planned the project and overviewed the research. H.P. designed the  
482 experiments. V.A.Y. curated and analyzed the data. J.G. devised the statistical  
483 analysis. L.S.K., A.I., E.K., M.G., R.K., and A.N. performed the mitochondrial stress  
484 test experiments and cell number quantification. V.A.Y., L.W. and J.G. made the  
485 figures. V.A.Y. and J.G. wrote the manuscript. All authors performed critical revision  
486 of the manuscript.

## 487 **References**

- 488 1. Gorman GS, Chinnery PF, DiMauro S, Hirano M, Koga Y, McFarland R, et al.  
489 Mitochondrial diseases. *Nat Rev Dis Prim* [Internet]. Macmillan Publishers  
490 Limited; 2016;2. Available from: <http://www.nature.com/articles/nrdp201680>
- 491 2. Bhola PD, Letai A. Mitochondria-Judges and Executioners of Cell Death  
492 Sentences. *Mol Cell* [Internet]. Elsevier Inc.; 2016;61(5):695–704. Available  
493 from: <http://dx.doi.org/10.1016/j.molcel.2016.02.019>
- 494 3. Sun N, Youle RJ, Finkel T. The Mitochondrial Basis of Aging. *Mol Cell*  
495 [Internet]. Elsevier Inc.; 2016;61(5):654–66. Available from:  
496 <http://dx.doi.org/10.1016/j.molcel.2016.01.028>
- 497 4. Wallace DC. Why do we still have a maternally inherited mitochondrial DNA?  
498 Insights from evolutionary medicine. *Annu Rev Biochem* [Internet].  
499 2007;76(1):781–821. Available from:  
500 <http://www.annualreviews.org/doi/abs/10.1146/annurev.biochem.76.081205.15>  
501 0955
- 502 5. Birsoy K, Wang T, Chen WW, Freinkman E, Abu-Remaileh M, Sabatini DM.  
503 An Essential Role of the Mitochondrial Electron Transport Chain in Cell  
504 Proliferation Is to Enable Aspartate Synthesis. *Cell* [Internet]. 2015;162:540–  
505 51. Available from:  
506 <http://linkinghub.elsevier.com/retrieve/pii/S0092867415008533>
- 507 6. Sullivan LB, Gui DY, Hosios AM, Bush LN, Freinkman E, Vander Heiden MG.  
508 Supporting Aspartate Biosynthesis Is an Essential Function of Respiration in  
509 Proliferating Cells. *Cell* [Internet]. Elsevier Inc.; 2015;162(3):552–63. Available  
510 from: <http://linkinghub.elsevier.com/retrieve/pii/S0092867415008545>
- 511 7. Zong W-X, Rabinowitz JD, White E. Mitochondria and Cancer. *Mol Cell*  
512 [Internet]. Elsevier Inc.; 2016;166(3):555–66. Available from:  
513 <http://dx.doi.org/10.1016/j.molcel.2016.02.011>
- 514 8. Weinberg SE, Sena LA, Chandel NS. Mitochondria in the regulation of innate  
515 and adaptive immunity. *Immunity* [Internet]. Elsevier Inc.; 2015;42(3):406–17.  
516 Available from: <http://dx.doi.org/10.1016/j.immuni.2015.02.002>
- 517 9. Titov D V, Cracan V, Goodman RP, Peng J, Grabarek Z, Mootha VK.  
518 Complementation of mitochondrial electron transport chain by manipulation of  
519 the NAD<sup>+</sup>/NADH ratio. *Science (80- )* [Internet]. 2016;352(6282):231–5.  
520 Available from: <http://www.ncbi.nlm.nih.gov/pubmed/27124460>
- 521 10. Wallace DC. Mitochondria and cancer. *Nat Rev Cancer* [Internet]. Nature

- 522 Publishing Group; 2012;12(10):685–98. Available from:  
523 <http://www.nature.com/doi/10.1038/nrc3365>
- 524 11. Dunham-Snary KJ, Sandel MW, Westbrook DG, Ballinger SW. Redox Biology  
525 A method for assessing mitochondrial bioenergetics in whole white adipose  
526 tissues. *Redox Biol* [Internet]. Elsevier Ltd.; 2014;2:656–60. Available from:  
527 <http://dx.doi.org/10.1016/j.redox.2014.04.005>
- 528 12. Yao J, Irwin RW, Zhao L, Nilsen J, Hamilton RT, Brinton RD. Mitochondrial  
529 bioenergetic deficit precedes Alzheimer's pathology in female mouse model of  
530 Alzheimer's disease. *PNAS*. 2009;106(34):14670–5.
- 531 13. Koopman M, Michels H, Dancy BM, Kamble R, Mouchiroud L, Auwerx J, et al.  
532 A screening-based platform for the assessment of cellular respiration in  
533 *Caenorhabditis elegans*. *Nat Protoc* [Internet]. Nature Publishing Group;  
534 2016;11(10):1798–816. Available from:  
535 <http://www.ncbi.nlm.nih.gov/pubmed/27583642>
- 536 14. Divakaruni AS, Paradyse A, Ferrick DA, Murphy AN, Jastroch M. Analysis and  
537 interpretation of microplate-based oxygen consumption and pH data. *Methods*  
538 *in Enzymology*. 2014. 275-307 p.
- 539 15. Ferrick DA, Neilson A, Beeson C. Advances in measuring cellular  
540 bioenergetics using extracellular flux. *Drug Discov Today*. 2008;13(March).
- 541 16. Dmitriev RI, Papkovsky DB. Optical probes and techniques for O<sub>2</sub>  
542 measurement in live cells and tissue. *Cell Mol Life Sci*. 2012;69:2025–39.
- 543 17. Brand MD, Nicholls DG. Assessing mitochondrial dysfunction in cells. *Biochem*  
544 *J*. 2011;435(2):297–312.
- 545 18. Hill BG, Benavides GA, Jr JRL, Ballinger S, Italia LD. Integration of cellular  
546 bioenergetics with mitochondrial quality control and autophagy. *Biol Chem*.  
547 2012;393(12):1485–512.
- 548 19. Gerencser AA, Neilson A, Choi SW, Edman U, Yadava N, Oh RJ, et al.  
549 Quantitative Microplate-Based Respirometry with Correction for Oxygen  
550 Diffusion. *Anal Chem*. 2009;81(16):6868–78.
- 551 20. Ribeiro SM, Giménez-cassina A, Daniai NN. Measurement of Mitochondrial  
552 Oxygen Consumption Rates in Mouse Primary Neurons and Astrocytes.  
553 *Methods Mol Biol*. 2015;1241:59–69.
- 554 21. Agilent Technologies. Mito Stress Test Kit, User Guide. 2017;(103016–400).  
555 Available from:  
556 [https://www.agilent.com/cs/library/usermanuals/public/XF\\_Cell\\_Mito\\_Stress\\_Test\\_Kit\\_User\\_Guide.pdf](https://www.agilent.com/cs/library/usermanuals/public/XF_Cell_Mito_Stress_Test_Kit_User_Guide.pdf)
- 557 22. Dranka BP, Benavides GA, Diers AR, Giordano S, Blake R, Reily C, et al.  
558 Assessing bioenergetic function in response to oxidative stress by metabolic  
559 profiling. *Free Radic Biol Med*. 2011;51(9):1621–35.
- 560 23. Zhang J, Nuebel E, Wisidagama DRR, Setoguchi K, Hong JS. Measuring  
561 energy metabolism in cultured cells, including human pluripotent stem cells  
562 and differentiated cells. *Nat Protoc*. 2012;7(6).
- 563 24. Zhou W, Choi M, Margineantu D, Margaretha L, Hesson J, Cavanaugh C, et  
564 al. HIF1 $\alpha$  induced switch from bivalent to exclusively glycolytic metabolism  
565 during ESC-to-EpiSC/hESC transition. *EMBO J* [Internet]. Nature Publishing  
566 Group; 2012;31(9):2103–16. Available from:  
567 <http://emboj.embopress.org/cgi/doi/10.1038/emboj.2012.71>  
568 <http://www.ncbi.nlm.nih.gov/pubmed/22446391>  
569 <http://www.pubmedcentral.nih.gov/articlerender.fcgi?artid=PMC3343469>
- 570 25. Shah-Simpson S, Pereira CFA, Dumoulin PC, Caradonna KL, Burleigh BA.  
571 Bioenergetic profiling of *Trypanosoma cruzi* life stages using Seahorse  
572 extracellular flux technology. *Mol Biochem Parasitol* [Internet]. Elsevier B.V.;  
573 2016;208(2):91–5. Available from:  
574 <http://dx.doi.org/10.1016/j.molbiopara.2016.07.001>
- 575 26. Dranka BP, Hill BG, Darley-Usmar VM. Mitochondrial reserve capacity in  
576

- 577 endothelial cells: The impact of nitric oxide and reactive oxygen species. *Free*  
578 *Radic Biol Med* [Internet]. Elsevier Inc.; 2010;48(7):905–14. Available from:  
579 <http://dx.doi.org/10.1016/j.freeradbiomed.2010.01.015>
- 580 27. Chacko BK, Kramer P a, Ravi S, Benavides G a, Mitchell T, Dranka BP, et al.  
581 The Bioenergetic Health Index: a new concept in mitochondrial translational  
582 research. *Clin Sci* [Internet]. 2014;127(6):367–73. Available from:  
583 <http://www.ncbi.nlm.nih.gov/pubmed/24895057>
- 584 28. Invernizzi F, D'Amato I, Jensen PB, Ravaglia S, Zeviani M, Tiranti V.  
585 Microscale oxygraphy reveals OXPHOS impairment in MRC mutant cells.  
586 *Mitochondrion* [Internet]. Elsevier B.V. and Mitochondria Research Society. All  
587 rights reserved; 2012;12(2):328–35. Available from:  
588 <http://dx.doi.org/10.1016/j.mito.2012.01.001>
- 589 29. Zhang J, Khvorostov I, Hong JS, Oktay Y, Vergnes L, Nuebel E, et al. UCP2  
590 regulates energy metabolism and differentiation potential of human pluripotent  
591 stem cells. *EMBO J* [Internet]. Nature Publishing Group; 2011;30(24):4860–  
592 73. Available from:  
593 <http://emboj.embopress.org/cgi/doi/10.1038/emboj.2011.401>
- 594 30. Stroud DA, Surgenor EE, Formosa LE, Reljic B, Frazier AE, Dibley MG, et al.  
595 Accessory subunits are integral for assembly and function of human  
596 mitochondrial complex I. *Nature* [Internet]. Nature Publishing Group;  
597 2016;538(7623):1–17. Available from:  
598 <http://www.nature.com/doi/10.1038/nature19754>  
599 <http://www.ncbi.nlm.nih.gov/pubmed/27626371>
- 600 31. Mitsopoulos P, Chang Y-H, Wai T, König T, Dunn SD, Langer T, et al.  
601 Stomatin-like protein 2 is required for in vivo mitochondrial respiratory chain  
602 supercomplex formation and optimal cell function. *Mol Cell Biol* [Internet].  
603 2015;35(10):1838–47. Available from:  
604 <http://www.pubmedcentral.nih.gov/articlerender.fcgi?artid=4405640&tool=pmc>  
605 [entrez&rendertype=abstract](http://www.ncbi.nlm.nih.gov/pubmed/27626371)
- 606 32. Almontashiri NAM, Chen HH, Mailloux RJ, Tatsuta T, Teng ACT, Mahmoud  
607 AB, et al. SPG7 Variant Escapes Phosphorylation-Regulated Processing by  
608 AFG3L2, Elevates Mitochondrial ROS, and Is Associated with Multiple Clinical  
609 Phenotypes. *Cell Rep* [Internet]. The Authors; 2014;7(3):834–47. Available  
610 from: <http://dx.doi.org/10.1016/j.celrep.2014.03.051>
- 611 33. Hautakangas MR, Hinttala R, Rantala H, Nieminen P, Uusimaa J, Hassinen  
612 IE. Evaluating clinical mitochondrial respiratory chain enzymes from biopsy  
613 specimens presenting skewed probability distribution of activity data.  
614 *Mitochondrion* [Internet]. Elsevier B.V. and Mitochondria Research Society;  
615 2016;29:53–8. Available from: <http://dx.doi.org/10.1016/j.mito.2016.05.004>
- 616 34. Kramer PA, Chacko BK, George DJ, Zhi D, Wei C-C, Dell'Italia LJ, et al.  
617 Decreased Bioenergetic Health Index in monocytes isolated from the  
618 pericardial fluid and blood of post-operative cardiac surgery patients. *Biosci*  
619 *Rep* [Internet]. 2015;35(4):e00237–e00237. Available from:  
620 <http://bioscirep.org/cgi/doi/10.1042/BSR20150161>
- 621 35. Hildick-Smith GJ, Cooney JD, Garone C, Kremer LS, Haack TB, Thon JN, et  
622 al. Macrocytic anemia and mitochondriopathy resulting from a defect in  
623 sideroflexin 4. *Am J Hum Genet* [Internet]. The American Society of Human  
624 Genetics; 2013;93(5):906–14. Available from:  
625 <http://dx.doi.org/10.1016/j.ajhg.2013.09.011>
- 626 36. Pronicka E, Piekutowska-Abramczuk D, Ciara E, Trubicka J, Rokicki D,  
627 Karkucińska-Więckowska A, et al. New perspective in diagnostics of  
628 mitochondrial disorders: two years' experience with whole-exome sequencing  
629 at a national paediatric centre. *J Transl Med* [Internet]. BioMed Central;  
630 2016;14(1):174. Available from: [http://translational-](http://translational-medicine.biomedcentral.com/articles/10.1186/s12967-016-0930-9)  
631 [medicine.biomedcentral.com/articles/10.1186/s12967-016-0930-9](http://translational-medicine.biomedcentral.com/articles/10.1186/s12967-016-0930-9)

- 632 37. Haack TB, Rolinski B, Haberberger B, Zimmermann F, Schum J, Strecker V,  
633 et al. Homozygous missense mutation in BOLA3 causes multiple  
634 mitochondrial dysfunctions syndrome in two siblings. *J Inher Metab Dis*.  
635 2013;36(1):55–62.
- 636 38. Kremer LS, Bader DM, Mertes C, Kopajtich R, Pichler G, Iuso A, et al. Genetic  
637 diagnosis of Mendelian disorders via RNA sequencing. *Nat Commun*  
638 [Internet]. 2017;8:15824. Available from:  
639 <http://www.nature.com/doifinder/10.1038/ncomms15824>
- 640 39. Van Haute L, Dietmann S, Kremer L, Hussain S, Pearce SF, Powell CA, et al.  
641 Deficient methylation and formylation of mt-tRNAMet wobble cytosine in a  
642 patient carrying mutations in NSUN3. *Nat Commun* [Internet]. Nature  
643 Publishing Group; 2016;7(May):12039. Available from:  
644 <http://www.nature.com/doifinder/10.1038/ncomms12039>
- 645 40. Powell CA, Kopajtich R, D'Souza AR, Rorbach J, Kremer LS, Husain RA, et al.  
646 TRMT5 Mutations Cause a Defect in Post-transcriptional Modification of  
647 Mitochondrial tRNA Associated with Multiple Respiratory-Chain Deficiencies.  
648 *Am J Hum Genet* [Internet]. The Authors; 2015;97(2):319–28. Available from:  
649 <http://dx.doi.org/10.1016/j.ajhg.2015.06.011>
- 650 41. Kremer LS, Distelmaier F, Alhaddad B, Hempel M, Iuso A, Küpper C, et al. Bi-  
651 allelic Truncating Mutations in TANGO2 Cause Infancy-Onset Recurrent  
652 Metabolic Crises with Encephalomyopathy. *Am J Hum Genet*.  
653 2016;98(2):358–62.
- 654 42. Seahorse Bioscience. Normalizing XF metabolic data to cellular or  
655 mitochondrial parameters, User Guide. 2014; Available from:  
656 [http://hpst.cz/sites/default/files/attachments/appnote-normalizing-metabolic-](http://hpst.cz/sites/default/files/attachments/appnote-normalizing-metabolic-data.pdf)  
657 [data.pdf](http://hpst.cz/sites/default/files/attachments/appnote-normalizing-metabolic-data.pdf)
- 658 43. Agilent Technologies. Multi-File XF Report Generator, User Guide. 2016;  
659 Available from: [http://www.agilent.com/cs/library/usermanuals/public/Report](http://www.agilent.com/cs/library/usermanuals/public/ReportGeneratorUserGuide_SeahorseXFCellMitoStressTest_MultiFile_RevA.pdf)  
660 [GeneratorUserGuide\\_SeahorseXFCellMitoStressTest\\_MultiFile\\_RevA.pdf](http://www.agilent.com/cs/library/usermanuals/public/ReportGeneratorUserGuide_SeahorseXFCellMitoStressTest_MultiFile_RevA.pdf)  
661





**A**

OCR, Cell line: Fibro\_VY\_017

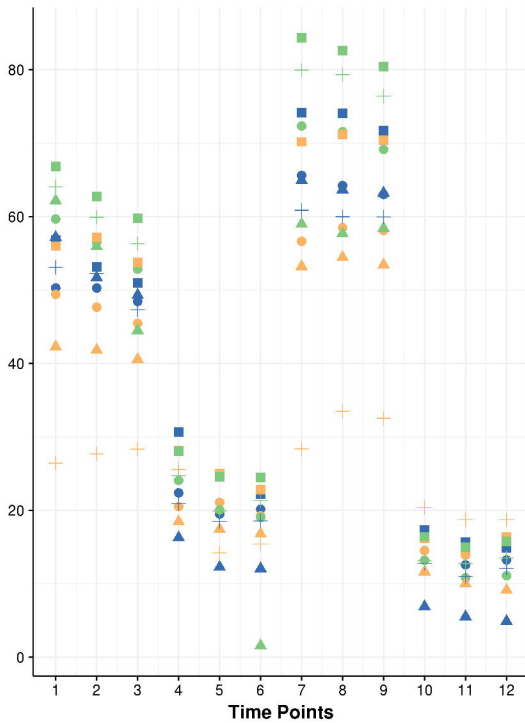**B**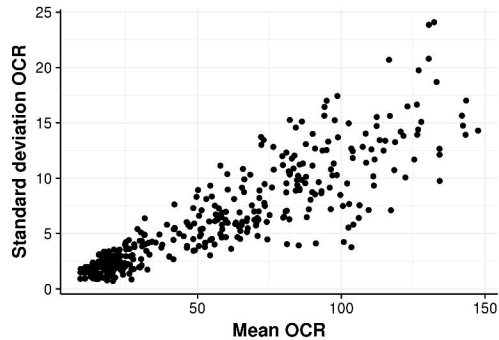

row  
 ● A  
 ▲ B  
 ■ C  
 + G

col  
 ● 4  
 ● 5  
 ● 6

**C**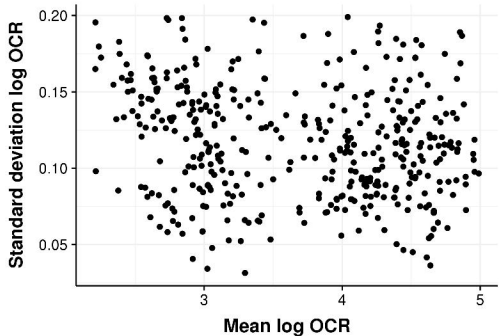

**A**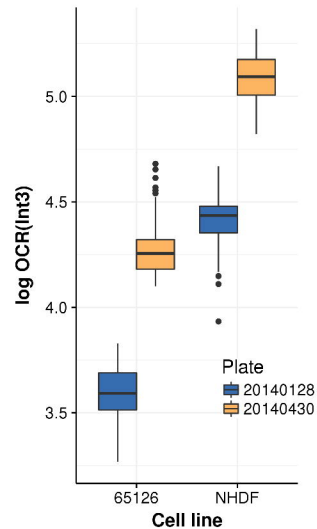**B**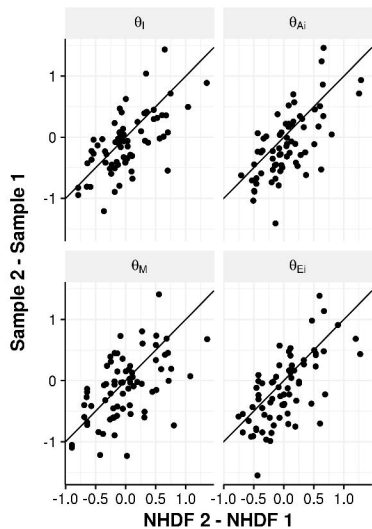**C**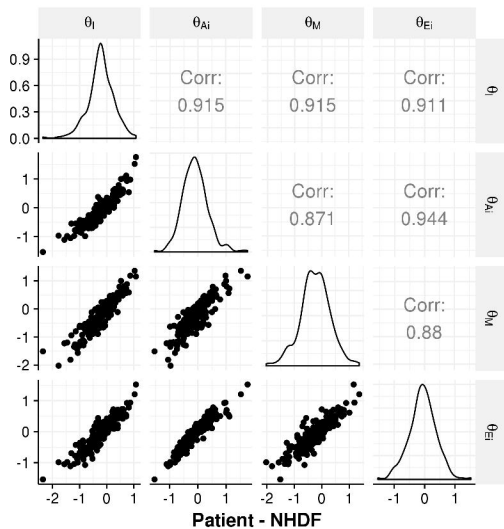

**A**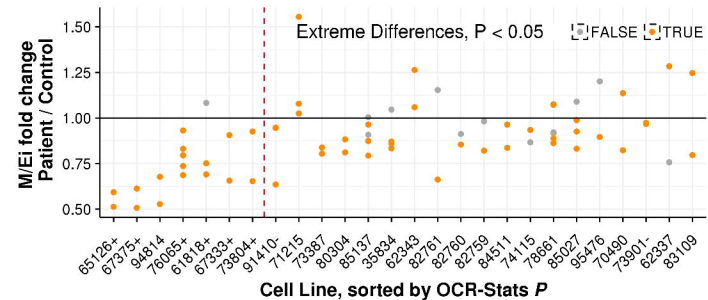**B**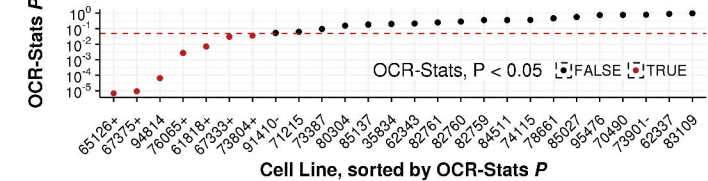**C**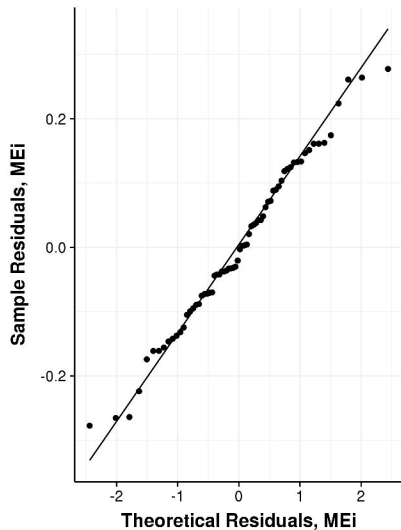

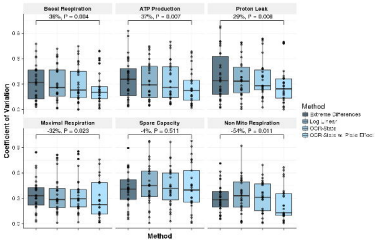

Source: http://biorxiv.org/content/10.1101/231522v2.full.pdf
